# Supplementary material for: Neuroimaging and Pathology Biomarkers in Parkinson’s Disease and Parkinsonism
Source: MDPI journal article supplement (doi:10.3390/brainsci16010110), 2026-01-19
Supplement: s1 [file brainsci-4090154-supplementary.pdf › brainsci-4090154-supplementary.pdf]

**Supplementary Table S1. Summary of biomarkers in Parkinson’s disease, dementia with Lewy bodies, and atypical parkinsonism.** Biomarkers are grouped by domain, modality, disease stage, clinical or research use, and maturity level. Color codes indicate clinical readiness: clinically established (green); emerging with/withour ongoing validation (orange); experimental, limited to research (red).

| Domain / Target                      | Modality                                                    | Disease Stage    | Clinical and/or Research Use      | Maturity Level                               |
|--------------------------------------|-------------------------------------------------------------|------------------|-----------------------------------|----------------------------------------------|
| IMAGING NEUROTRANSMITTER DYSFUNCTION |                                                             |                  |                                   |                                              |
| DOPAMINE                             |                                                             |                  |                                   |                                              |
| Dopamine (presynaptic)               | DAT-SPECT / [ <sup>18</sup> F]DOPA PET                      | Prodromal, Early | Diagnosis. Trial enrichment       | <span>●</span> Clinical                      |
| Dopamine (postsynaptic)              | D2 PET                                                      | Advanced         | Post-synatpic dopamine function   | <span>●</span> Research                      |
| Neuromelanin in SN                   | NM-MRI                                                      | Prodromal, Early | Supportive early marker           | <span>●</span> Emerging (Ongoing validation) |
| Nigral Iron Deposition               | QSM / SWI (MRI)                                             | Prodromal, Early | Early detection. Diagnosis        | <span>●</span> Clinical                      |
| NORDADRENALINE                       |                                                             |                  |                                   |                                              |
| Noradrenaline (NAT)                  | [ <sup>11</sup> C]MeNER PET                                 | Prodromal, Early | Non-motor phenotyping             | <span>●</span> Emerging                      |
| Noradrenaline (LC)                   | LC NM-MRI                                                   | Prodromal, Early | Non-motor phenotyping             | <span>●</span> Emerging (Ongoing validation) |
| ACETYLCHOLINE                        |                                                             |                  |                                   |                                              |
| Cholinergic System (NBM, PPN)        | [ <sup>11</sup> C]-Donepezil, [ <sup>18</sup> F]FEOBV PET   | Early - Advanced | Cognition, gait dysfunction       | <span>●</span> Emerging                      |
| Cholinergic System (NBM)             | Volumetric MRI                                              | Early - Advanced | Predicting cognitive decline      | <span>●</span> Emerging                      |
| SEROTONIN                            |                                                             |                  |                                   |                                              |
| Serotonin (Raphe, SERT)              | [ <sup>123</sup> I]FP-CIT, [ <sup>11</sup> C]WAY-100635 PET | Variable         | Tremor, psychiatric symptoms      | <span>●</span> Emerging                      |
| IMAGING BRAIN PATHOLOGY              |                                                             |                  |                                   |                                              |
| α-Synuclein Aggregates               | α-syn PET ([ <sup>18</sup> F]C05-05, SPAL-T-06)             | Early. Research  | Diagnosis, patient stratification | <span>●</span> Research                      |

| Domain / Target                                  | Modality                                                    | Disease Stage    | Clinical and/or Research Use                                          | Maturity Level                  |
|--------------------------------------------------|-------------------------------------------------------------|------------------|-----------------------------------------------------------------------|---------------------------------|
| Tau (4R)                                         | PET (PI-2620, PM-PBB3)                                      | Atypical PKS     | Differential diagnosis                                                | ● Emerging                      |
| β-Amyloid                                        | PET ([ <sup>11</sup> C]PiB, [ <sup>18</sup> F]Florbetaben)  | DLB, PDD         | Diagnosis. Prognosis. Co-pathology                                    | ● Clinical                      |
| Neuroinflammation                                | TSPO ([ <sup>11</sup> C]PK11195, [ <sup>18</sup> F]DPA-714) | Variable         | Pathophysiological research                                           | ● Research                      |
| NETWORK AND OTHER IMAGING MARKERS                |                                                             |                  |                                                                       |                                 |
| Glucose Hypometabolism                           | FDG-PET                                                     | All stages       | Differential diagnosis, staging.                                      | ● Clinical                      |
| Structural MRI (Morphometry)                     | MRI                                                         | All stages       | Diagnosis of PSP, MSA, CBS                                            | ● Clinical                      |
| Free Water Imaging                               | Diffusion MRI                                               | Early            | Gait, cognition prediction                                            | ● Emerging                      |
| DBS Planning                                     | Structural MRI                                              | Advanced         | Personalized therapy planning (DBS)                                   | ● Clinical                      |
| Functional Connectivity                          | fMRI, DTI, Connectomics                                     | Advanced         | Personalized therapy planning (DBS, MRgFUS)                           | ● Emerging                      |
| IN VIVO PATHOLOGY AND NEUROPHYSIOLOGICAL MARKERS |                                                             |                  |                                                                       |                                 |
| Seed Amplification Assay (SAA)                   | CSF (± skin biopsy, olfactory mucosa, blood)                | Prodromal, Early | Biological confirmation of synuclein pathology. Application in trials | ● Emerging (ongoing validation) |
| Skin Biopsy (p-α-syn detection)                  | Immunofluorescence                                          | Early - Advanced | Synucleinopathy diagnosis                                             | ● Emerging (ongoing validation) |
| Local Field Potentials (LFPs)                    | Intraoperative Electrophysiology                            | Advanced         | Adaptive DBS programming                                              | ● Clinical                      |

**Supplementary Table S2.** Faculty contributions

| Faculty                    | Expertise                                                                 | Course lecture topic                                                                       | Manuscript contribution                                                                                  |
|----------------------------|---------------------------------------------------------------------------|--------------------------------------------------------------------------------------------|----------------------------------------------------------------------------------------------------------|
| <b>Roberto Cilia</b>       | Movement disorders; clinical translation; molecular imaging.              | Course Direction; Chair                                                                    | Overall coordination; drafting the first manuscript draft including cross-sectional integration          |
| <b>Dario Arnaldi</b>       | Prodromal synucleinopathies; sleep medicine; iRBD risk stratification     | Prodromal stages of Synucleinopathies: Sleep and Glymphatic dysfunction                    | Section 4.<br><i>4.1. From Prodromal to Overt Clinical stages</i>                                        |
| <b>Bénédicte Ballanger</b> | Noradrenergic system; PET/MRI biomarkers; non-motor symptoms              | Noradrenergic Dysfunction: Molecular and MRI Biomarkers                                    | Section 1<br><i>1.2. Noradrenergic Dysfunction</i>                                                       |
| <b>Roberto Ceravolo</b>    | Dopaminergic molecular imaging; SPECT/PET biomarkers                      | Dopaminergic Dysfunction: Molecular Biomarkers                                             | Section 1<br><i>1.1. Dopaminergic Dysfunction - Molecular Imaging</i>                                    |
| <b>Rosa De Micco</b>       | Network neuroscience; connectomics; progression modeling                  | Staging Parkinson's Disease: A Network Perspective                                         | Section 4<br><i>4.3. Network-driven conceptualization of PD</i>                                          |
| <b>Angelo Del Sole</b>     | Amyloid imaging; mixed pathologies; nuclear medicine                      | Imaging Amyloid and copathology; Chair (molecular imaging session)                         | Section 2<br><i>2.3. Imaging Amyloid and Copathology</i>                                                 |
| <b>Roberto Eleopra</b>     | Movement disorders; clinical phenotyping; advanced therapies              | Chair (session discussion)                                                                 | Editorial contribution; clinical integration across sections                                             |
| <b>Hironobu Endo</b>       | $\alpha$ -synuclein imaging; PET tracer development                       | Imaging Alpha-synuclein pathology                                                          | Section 2<br><i>2.1. Imaging <math>\alpha</math>-Synuclein Pathology</i>                                 |
| <b>Alfonso Fasano</b>      | Surgical therapies; DBS and lesioning; advanced PD management             | Management of Parkinson's disease: surgical approaches                                     | Section 4<br><i>4.6. Management of PD: pharmacological and surgical approaches - Surgical approaches</i> |
| <b>Merle C. Hoenig</b>     | Motor/cognitive reserve; resilience/compensation; neuroimaging correlates | The concept of Motor and Cognitive reserve vs. compensation in Neurodegenerative disorders | Section 4<br><i>4.2. The Concept of Motor and Cognitive Resilience vs. Compensation in</i>               |

|                          |                                                                                  |                                                                                                                                   |                                                                                                                                                                                                                      |
|--------------------------|----------------------------------------------------------------------------------|-----------------------------------------------------------------------------------------------------------------------------------|----------------------------------------------------------------------------------------------------------------------------------------------------------------------------------------------------------------------|
|                          |                                                                                  |                                                                                                                                   | <i>Neurodegenerative Disorders:<br/>Two Sides of the Same Coin?</i>                                                                                                                                                  |
| <b>Jacob Horsager</b>    | Cholinergic dysfunction;<br>PD subtypes; brain-<br>first/body-first model        | Cholinergic Dysfunction:<br>Molecular Biomarkers                                                                                  | Section 1<br><i>1.3. Cholinergic Dysfunction —<br/>Molecular Imaging</i><br>Section 3<br><i>3.5. Brain-First vs. Body-First: A<br/>Model to Reconcile Clinical,<br/>Imaging, and Pathological<br/>Heterogeneity.</i> |
| <b>Stéphane Lehericy</b> | MRI biomarkers;<br>neuromelanin/iron-<br>sensitive MRI; nigrostriatal<br>imaging | Dopaminergic Dysfunction:<br>MRI Biomarkers                                                                                       | Section 1<br><i>1.1. Dopaminergic Dysfunction<br/>- Magnetic Resonance Imaging</i>                                                                                                                                   |
| <b>Valentina Leta</b>    | Pharmacological therapy;<br>infusion strategies;<br>levodopa pharmacokinetics    | Management of Parkinson's<br>disease: oral and infusion<br>pharmacological approaches                                             | Section 4<br><i>4.6. Management of PD:<br/>pharmacological and surgical<br/>approaches - Oral and infusion<br/>pharmacological approaches</i>                                                                        |
| <b>Fabio Moda</b>        | Seed amplification assays;<br>translational biomarkers                           | Alpha-Synuclein Seed<br>Amplification Assay: Present<br>and Future                                                                | Section 3<br><i>3.2. aSyn Seed Amplification<br/>Assays: Present and Future</i>                                                                                                                                      |
| <b>Maria Nolano</b>      | Skin biopsy; peripheral<br>neuropathology; autonomic<br>involvement              | Update on the role Skin<br>Biopsy in the diagnosis of<br>Parkinsonism                                                             | Section 3<br><i>3.3. The Role Skin Biopsy in the<br/>Diagnosis of Parkinsonism</i>                                                                                                                                   |
| <b>Tiago F. Outeiro</b>  | $\alpha$ -synuclein biology;<br>therapeutic pipelines;<br>disease mechanisms     | Alpha-Synuclein: New<br>discoveries and potential<br>therapeutic applications                                                     | Section 3<br><i>3.1. aSyn Biology: From<br/>Aggregates to Therapeutic<br/>Strategies</i>                                                                                                                             |
| <b>Laura Parkkinen</b>   | Neuropathology; co-<br>pathologies in PD and<br>parkinsonism                     | The Role of Copathology in<br>Parkinson's disease: the<br>Neuropathologist's<br>Perspective; Chair<br>(pathology-focused session) | Section 3<br><i>3.4. The Role of Co-pathologies in<br/>PD: The Neuropathologist's<br/>Perspective</i>                                                                                                                |
| <b>Nicola Pavese</b>     | Serotonergic imaging;<br>neuropsychiatric and motor<br>complications             | Serotonergic Dysfunction:<br>Molecular Biomarkers                                                                                 | Section 1<br><i>1.4. Serotonergic Dysfunction</i>                                                                                                                                                                    |

|                             |                                                                       |                                                                 |                                                                                                                     |
|-----------------------------|-----------------------------------------------------------------------|-----------------------------------------------------------------|---------------------------------------------------------------------------------------------------------------------|
| <b>Andrea Quattrone</b>     | MRI in atypical parkinsonism; differential diagnosis; trial endpoints | Imaging Biomarkers in Atypical Parkinsonian Disorders           | Section 4<br><i>4.5. MRI Biomarkers in Atypical Parkinsonian Disorders</i>                                          |
| <b>Nicola J. Ray</b>        | Cholinergic networks; MRI biomarkers; cognition/gait correlates       | Cholinergic Dysfunction: MRI Biomarkers                         | Section 1<br><i>1.3. Cholinergic Dysfunction – Magnetic Resonance Imaging</i>                                       |
| <b>Martin M. Reich</b>      | DBS connectomics; neuroimaging-guided targeting/programming           | Updates on Neuroimaging approaches in Deep Brain Stimulation    | Section 4<br><i>4.6. Management of PD: pharmacological and surgical approaches - Neuroimaging approaches in DBS</i> |
| <b>Irena Rektorova</b>      | Cognitive impairment imaging; MRI markers in Lewy body diseases       | Imaging Cognitive Impairment; Chair (molecular imaging session) | Section 4<br><i>4.4. MRI for tracking Cognitive Impairment in Lewy Body Diseases</i>                                |
| <b>Antonio P. Strafella</b> | SPECT & PET molecular imaging; TSPO PET;                              | Imaging Neuroinflammation; Chair (molecular imaging session)    | Section 2<br><i>2.4. Imaging Neuroinflammation</i>                                                                  |
| <b>Fabrizio Tagliavini</b>  | Neuropathology; neurodegenerative disease mechanisms                  | Chair (pathology-focused session)                               | Editorial contribution; pathology integration across sections                                                       |
| <b>Alessandro Tessitore</b> | Functional connectivity; PD networks; imaging signatures              | Chair (imaging sessions)                                        | Editorial contribution; MRI imaging and functional connectivity                                                     |
| <b>Thilo van Eimeren</b>    | Tau imaging; multimodal neuroimaging; course direction                | Imaging Tau pathology Course Direction; Chair                   | Section 2<br><i>2.2. Imaging Tau Pathology</i>                                                                      |

**Abbreviations:** DBS, deep brain stimulation; iRBD, isolated/idiopathic REM sleep behavior disorder; MRI, magnetic resonance imaging; PET, positron emission tomography; SPECT, single photon emission computed tomography; TSPO, 18-kDa translocator protein.
